# Supplementary material for: DNA Methylation Causes Predominant Maternal Controls of Plant Embryo Growth
Source: PubMed Central journal article supplement (PMC2390113; doi:10.1371/journal.pone.0002298), 2008-05-28
Supplement: pone.0002298.s003.pdf [file pone.0002298.s003.pdf]

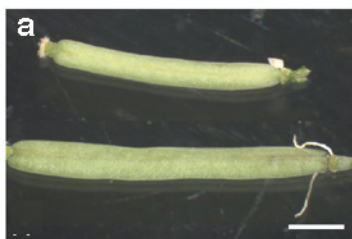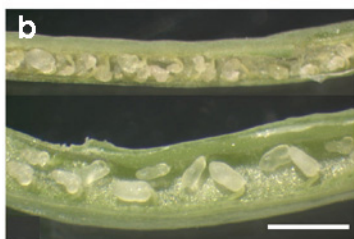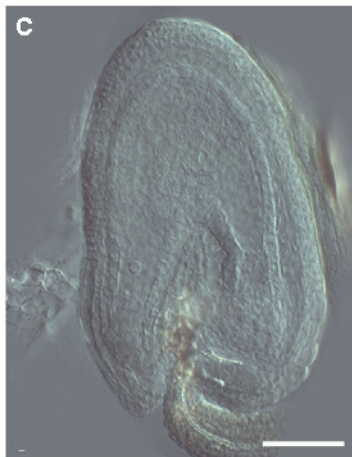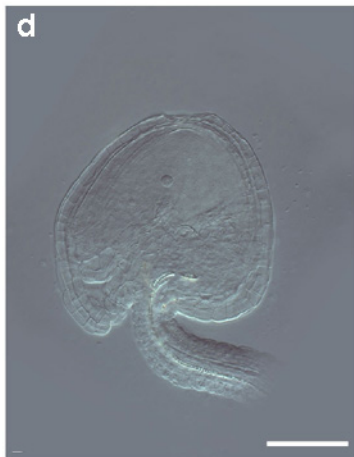

**FitzGerald Supplementary Fig. 3**
