# Supplementary material for: DNA Methylation Causes Predominant Maternal Controls of Plant Embryo Growth
Source: PLOS journal article supplement (doi:10.1371/journal.pone.0002298), 2008-05-28
Supplement: S2 (10.1371/journal.pone.0002298.s002) [file journal.pone.0002298.s002]

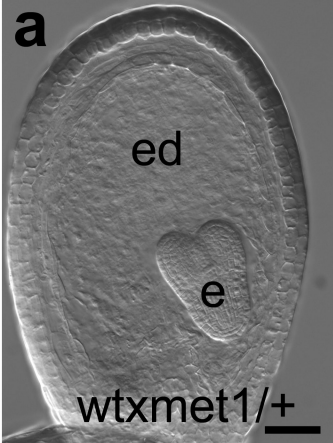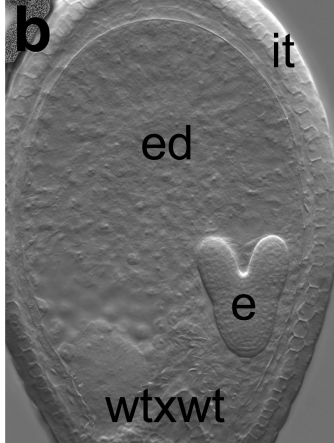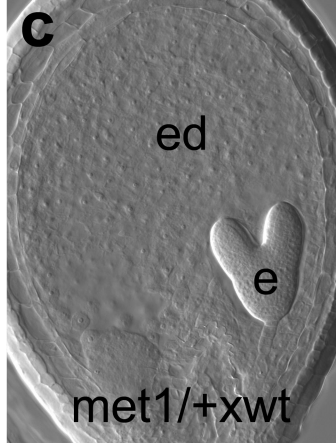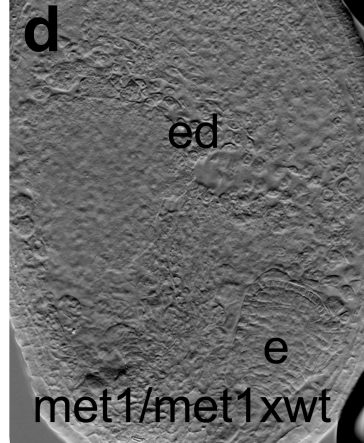

FitzGerald Supplementary Figure 2
